# Supplementary material
Source: MDPI journal article supplement (https://www.mdpi.com/2079-6412/12/12/1984)
Supplement: s1 [file s1]

# Supplementary Materials: The Role of Biochar Nanoparticles Performing as Nanocarriers for Fertilizers on the Growth Promotion of Chinese Cabbage (*Brassica rapa* (Pekinensis Group))

Ruiping Yang <sup>1,2</sup>, Jiamin Shen <sup>1</sup>, Yuhan Zhang <sup>1</sup>, Lin Jiang <sup>1</sup>, Xiaoping Sun <sup>1</sup>, Zhengyang Wang <sup>3</sup>, Boping Tang <sup>1,\*</sup> and Yu Shen <sup>2,\*</sup>

<sup>1</sup> Jiangsu Key Laboratory for Bioresources of Saline Soils, Jiangsu Synthetic Innovation Center for Coastal Bio-Agriculture, School of Wetlands, Yancheng Teachers University, Yancheng 224007, China

<sup>2</sup> Co-Innovation Center for the Sustainable Forestry in Southern China; College of Biology and the Environment, Nanjing Forestry University, Nanjing 210037, China

<sup>3</sup> Department of Environmental Sciences; The Connecticut Agricultural Experiment Station, New Haven, CT 06504, USA

\* Correspondence: boptang@163.com (B.T.); [sheyttmax@hotmail.com](mailto:sheyttmax@hotmail.com) or yushen@njfu.edu.cn (Y.S.)

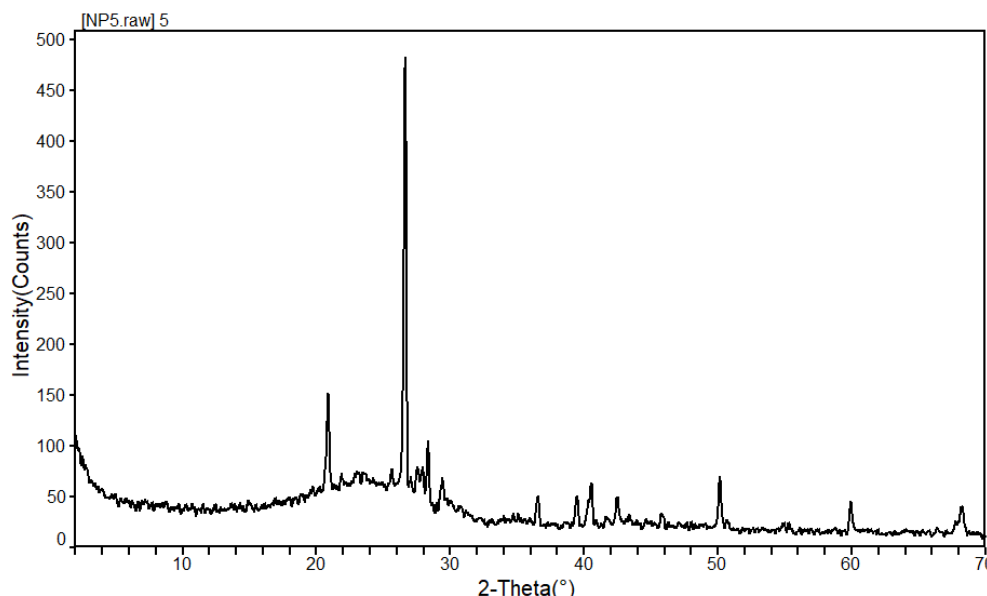

**Figure S1.** The X-ray diffractometer (XRD) of BNPs.

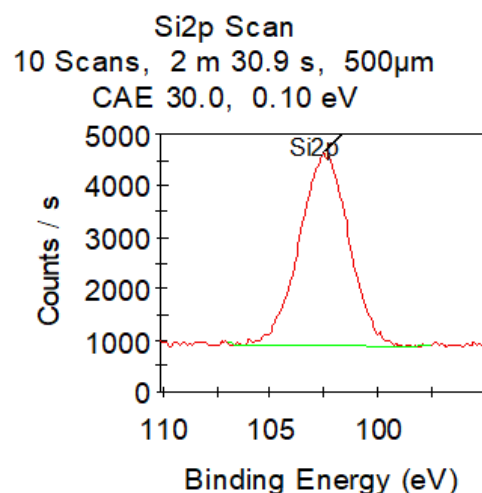

**Figure S2.** X-ray photoelectron spectroscopy (XPS) of BNPs.

**Table S1.** The Summary of the Surface-Area and the Pore Size of BNPs.

| Index                                     | Content |
|-------------------------------------------|---------|
| Surface-Area (m <sup>2</sup> /g)          |         |
| Single point surface area                 | 46.37   |
| BET Surface Area                          | 53.67   |
| Langmuir Surface Area                     | 76.42   |
| Pore Volume (cm <sup>3</sup> /g)          |         |
| Single point adsorption total pore volume | 0.12    |
| SF micropore volume                       | 0.01    |
| Pore Size (nm)                            |         |
| Total adsorption average pore width       | 9.23    |
| BJH Median pore width                     | 2.21    |

**Table S2.** Response Surface Model for Screening Experiment.

| Treatments | N | P | K |
|------------|---|---|---|
| T1         | 0 | 0 | 0 |
| T2         | 0 | 2 | 2 |
| T3         | 1 | 2 | 2 |
| T4         | 2 | 0 | 2 |
| T5         | 2 | 1 | 2 |
| T6         | 2 | 2 | 2 |
| T7         | 2 | 3 | 2 |
| T8         | 2 | 2 | 3 |
| T9         | 2 | 2 | 0 |
| T10        | 2 | 2 | 1 |
| T11        | 3 | 2 | 2 |
| T12        | 1 | 3 | 2 |
| T13        | 1 | 1 | 2 |
| T14        | 1 | 2 | 1 |
| T15        | 2 | 1 | 1 |

**Table S3.** The Treatments for Experiment of Comparison.

| Treatments | Biochar NPs | N   | K   |
|------------|-------------|-----|-----|
| T1         | 1           | 2   | 2   |
| T2         | 2           | 2   | 2   |
| T3         | 2           | 1   | 1   |
| T4         | 2           | 0.5 | 0.5 |
| T5         | 2           | 0   | 0   |
| T6         | 0           | 2   | 2   |

**Table S4.** Plant Weight for Experiment of Comparison.

| Treatments | Aboveground Fresh Weight(g) | Underground Fresh Weight(g) | Aboveground Dry Weight(g) | Underground Dry Weight(g) |
|------------|-----------------------------|-----------------------------|---------------------------|---------------------------|
| T1         | 46.05 ± 2.98 b              | 2.35 ± 0.29 ab              | 3.88 ± 0.26 c             | 0.50 ± 0.05 bc            |
| T2         | 47.78 ± 1.77 bc             | 2.17 ± 0.16 ab              | 3.70 ± 0.03 bc            | 0.46 ± 0.05 b             |
| T3         | 62.72 ± 2.80 d              | 3.67 ± 0.64 bc              | 4.68 ± 0.27 d             | 0.78 ± 0.16 d             |
| T4         | 53.82 ± 1.66 c              | 5.93 ± 1.54 c               | 4.54 ± 0.10 d             | 0.74 ± 0.10 cd            |
| T5         | 2.55 ± 0.28 a               | 0.76 ± 0.05 a               | 0.54 ± 0.05 a             | 0.10 ± 0.00 a             |
| T6         | 43.69 ± 2.21 b              | 3.68 ± 0.66 bc              | 3.34 ± 0.14 b             | 0.42 ± 0.06 b             |

**Table S5.** Nutrient contents for Experiment of Comparison.

|             | Treatments | Calcium        | Potassium       | Magnesium       | Sodium          | Phosphorus     | Sulphur         |
|-------------|------------|----------------|-----------------|-----------------|-----------------|----------------|-----------------|
| Aboveground | T1         | 29.21 ± 1.93 b | 30.10 ± 1.02 c  | 4.57 ± 0.57 b   | 5.09 ± 0.24 a   | 2.18 ± 0.10 b  | 10.04 ± 0.67 cd |
|             | T2         | 22.94 ± 3.74 b | 27.81 ± 2.27 bc | 3.11 ± 0.54 a   | 5.19 ± 0.37 ab  | 1.79 ± 0.23 ab | 7.99 ± 0.98 bc  |
|             | T3         | 13.55 ± 1.68 a | 19.74 ± 3.32 a  | 2.34 ± 0.47 a   | 5.42 ± 0.56 ab  | 1.16 ± 0.23 a  | 6.29 ± 1.42 ab  |
|             | T4         | 7.15 ± 0.16 a  | 20.78 ± 2.83 ab | 2.11 ± 0.16 a   | 6.60 ± 0.56 b   | 1.42 ± 0.22 ab | 6.57 ± 0.90 ab  |
|             | T5         | 7.20 ± 0.36 a  | 28.02 ± 1.77 bc | 2.92 ± 0.13 a   | 8.11 ± 0.50 c   | 4.49 ± 0.49 c  | 4.44 ± 0.14 a   |
|             | T6         | 24.86 ± 5.92 b | 32.73 ± 2.48 c  | 3.30 ± 0.39 a   | 5.25 ± 0.47 ab  | 2.13 ± 0.29 b  | 11.53 ± 1.79 d  |
| Underground | T1         | 23.53 ± 2.20 d | 52.70 ± 1.42 b  | 2.45 ± 0.13 abc | 6.51 ± 0.39 ab  | 1.50 ± 0.17 a  | 7.34 ± 0.88 b   |
|             | T2         | 23.77 ± 0.74 d | 51.41 ± 3.59 b  | 2.42 ± 0.09 bc  | 8.61 ± 0.98 bc  | 1.71 ± 0.10 a  | 8.32 ± 0.45 b   |
|             | T3         | 16.59 ± 0.71 c | 48.40 ± 1.94 b  | 2.37 ± 0.13 bc  | 7.84 ± 0.48 abc | 1.63 ± 0.09 a  | 7.33 ± 0.48 b   |
|             | T4         | 12.16 ± 0.85 b | 49.10 ± 2.70 b  | 2.56 ± 0.12 c   | 9.76 ± 1.27 c   | 1.88 ± 0.07 a  | 6.84 ± 0.48 b   |
|             | T5         | 7.16 ± 0.49 a  | 34.61 ± 1.10 a  | 1.83 ± 0.10 ab  | 5.76 ± 0.62 a   | 4.75 ± 0.28 b  | 3.56 ± 0.22 a   |
|             | T6         | 21.52 ± 1.75 d | 55.77 ± 3.14 b  | 2.10 ± 0.08 a   | 6.78 ± 0.74 ab  | 1.81 ± 0.21 a  | 7.32 ± 0.27 b   |

Note, Data are shown in mean ± SE (standard error); Different letters indicate the significant differences with  $p < 0.05$ .
